# Supplementary material
Source: publisher figshare collection journal article supplement (https://plos.figshare.com/articles/dataset/_/1430592)

A

```

Ce_CEH-86      -----MPTSSSTPPIVYETDLEPIYIYQDCYCHKELVFC-----KNMKFGGEIFKYNSSGTNSSIRRVQDCC-VY-----KDQEI DEEMSEKVKTFKGTIDF-----85
Ce_C35E7.2a    -----MNTSEYONPPSKYSTSTQTQPLPKV-----MNPNDQVSQKPKAEQS-----17
CBG08468      -----MNPNDQVSQKPKAEQS-----17
CRE_28417      -----MNPNDQVSQKPKAEQS-----17
CRE_28418      -----MNPNDQVSQKPKAEQS-----17
Ce_C35E7.5a    -----MNPNDQVSQKPKAEQS-----17
CBG08470      -----MNPNDQVSQKPKAEQS-----17
Ce_C35E7.3     -----MNPNDQVSQKPKAEQS-----17
CAEBREN_12536  -----MNPNDQVSQKPKAEQS-----17
CBG08472      -----MNPNDQVSQKPKAEQS-----17
CRE_28419      -----MNPNDQVSQKPKAEQS-----17
1.....10.....20.....30.....40.....50.....60.....70.....80.....90.....100.....110.....120.....130.....140.....150

```

```

Ce_CEH-86      ROVVQNNCFOH--SPLYSKCEHYGHMIGF--FVNSLKDTVMAYDLADGLFQETKDCGC--CL-----HKDVLTLNHFIEKS--HRDEYQGTICNDIN--HTKEHGKMSIFFNSQGFGEYRNNRVQCKLKOLD212
Ce_C35E7.2a    ARIV-----PKYSVVCENSLEVLFGT--DNGVFGKRIY--KNNEFLKAPDCVQCISLR--ADDNLRTDSVBEVQGRATDKLHRGIDGQORLMCIGIS--NIGCKQSGVMDTFVNIHIGIKGYRKTPEGLLIK-DENKA150
CBG08468      EKPQKQPK-----EVYRSRVCEKTHTLIVFA--HGEDKGLGRYIP--TGSDPVKAPHCCECTCLN--DKFHNVSDFPHGALGNVGE--QHDSEFNRLIPISMK--HTTCRQRRARFVFAHENGSGRNVHSPEGYYPHSEPLKS147
CRE_28417      EVLKPIPTIRTVNLPKFSRVCKISLEVMVFA--NSKTKKLHRYVF--ENNDPKRADECCSDTCYVDPFIMISPSGRAFGDEKR--VDCYGEALINIGIT--HTKCRQTGSMDLFVHANGSIGIYV-KTKLGMQLFEMNDD180
CRE_28418      KELVDEENNNFFWIRPFHSDICLETNEIVIFCLIIYENKVLQAYSFDPKTQKFTKS--CCQCKKCNIT--DHTNSDGHSGQIGYRRS--HRDRNGLPLVCLAIT--N-KNSYEGLNIFCDEQGYIGRYEYNYDQKCDLLELLD200
Ce_C35E7.5a    ELEVDERRMNNLEIMCSEYCEQCEMTIFAK--DTDEEFPMTNPKTQSTYS-KCK--ECIENT--KFAIRRHYNQOISKLAGTFLPYQDRKGKELISLOUT--N-LNKEQGNMEYFVNPFGNISKYQNEKQYADHVRTLD148
CBG08470      NDVLMDMTANFLWLRFYSIDICSETNEVVVFLMKYPETKKLAAYSPNPETQYFLES--DCECKKCTET--NHTYNNMSSHSGQIGYQRT--HRDRNGLPLVCLAIT--N-KNSYEGLNIFCDEQGYIGRYEYNYDQKCDLLELLD267
Ce_C35E7.3     DELVDEDSGNFLWIQPKYSSICVKTNNAVIRTFPENFKLDAYTFDPETQKFEELS--NCKCDGCSNIT--DYSLSSEFFGAQIGYQRT--HRDQNGLPLVCLAIT--N-KNSYEGLNIFCDEQGYIGRYEYNYDQKCDLLELLD253
CAEBREN_12536  GRRVDEENGNCLWFQPVYSKNCENTOKITVFAGIYQOLDIYLPNFDLHQRNFVKS--ECRENCCKER--FLSALAPRTDFGNGQGCARS--HRDQAGRPLICLAIT--N-YNKEHGQMEIFMDQDGDIGRYEYNSRKCKFLQKLTLE195
CBG08472      DEMVDDSDSYLWIQPVFSKCEVTISKMAVFASVFPDVSRLVFNFDAGNKQFVRS--ICDADCCMEARNDD--GISPAADFSGSQGHYSRT--HRDQAGRPLICLAIT--N-YNKEHGQMEIFMDQDGDIGRYEYNSRKCKFLQKLTLE265
CRE_28419      DKPVDDDKYSYLWQPVFVSFKQNTGKIVTFASIKYPHQDRLLANFNDLEKLNVPFA--EQCEQCCOMTGFDRRISPRADFSGSQGHYSARS--HHDQAGRPLICLAIT--N-YNKEHGQMEIFMDQDGDIGRYEYNSRKCKFLQKLTLE266
.....160.....170.....180.....190.....200.....210.....220.....230.....240.....250.....260.....270.....280.....290.....300

```

### CEH-86 homeodomain

```

Ce_CEH-86      VKTTEYEVAADRDEDEKNWSSFSYDAIHLEQYRRTKYVSSDCKSEK-----HLEELIEKFRARRATS-----KREANSNEDLTSQYQOTKLTK-----304
Ce_C35E7.2a    IALPNFPIQNTQA-----IMEKDL-----LNTKICPHVSQKIYFKCTKTSKESVHVVLNKLTHFEILKCSVCTDKNLEIYDKDKTKLYAETVRCETTEKFAIRSAKNENFLSTYCPKTLT-----LKIQSPVAMEERKL282
CBG08468      IKCLPMESNIP-----IMDTEFT-----LSHAVFCAHKDKVYVC--TREGIMEQLIFNKTTHFERIKCKHCISD--KCG--DPAGRKYQAEIPTSXSDFVGYQANNQOWTKFNTNRR--FDVQSDMVLDCRS269
CRE_28417      VKMIPATNPPTGKE-----VMDSSFK-----LIDKQCMPLSVVTFMVRSIR--EGSTEQLVFNKTTDQFEMIRCEKCMQDRQKKG--KTVDGDLCEWVATNCEKYTVYRGEQGGKTKWVFTVTRQS--WEYCSKSVMDCRM309
CRE_28418      IRVSHSIQETEVKKR-----PDLLFDDCLR-----VLVYHSHCDQNLRTFFFGYHQMDDTMQKTFNEYSHQFEIFKCSDCKEHS--KVG--KPTAESVFPTPSLLTGKMGIRLMDKDRSEKTVQVNDYS--VKLEKAPIRNLHF333
Ce_C35E7.5a    VETLASGSINKMLG-----IVEEKS-----TAYAHARNRLIQVN-----TEQLWAGERSSS-----QLG-----SLPPVSKPEKKVLVQLQ-----215
CBG08470      VRVHSMNDME-----PR-----PELLDDDLR-----LFYIEHCREMKRDFFYGFHRKDKKPKQYTFNEVTLQDFLFCSDCHFDQK-KAQ--LYLEDKPALAS--TCKLITGRDITVSYGTNGVPKATIRGDSGSEIKMGKAPIRNLHY400
Ce_C35E7.3     VRVHKVLETSRSTSK-----PRLLIDDLF-----IYHKDNCKKLDMPYFYGHFEEGKTRKYLNNRTLOFERIKCPDCIDSRKIVR--SRALTDLAVTRCDLTSKIKKRRKPMGRVEKSETIRHGF--LPLGKAPIRFLKYL387
CAEBREN_12536  VRCNHHFYNKO--GDK-----KGLVDDDLR-----VMEHTKCPALKEDVYFCHLSDDGKTRKIYFDVTLQFVLVKCPCCSPTGG--YSA--NNTMVFTLGVVMPCATOGKVMILKDKDSMLKVMVTVYGTSS--VTMTSPIRMDSHL327
CBG08472      VRTMSHRYPSEEHET-----AEVLYDNELY-----LNTKNCSSLRDKIYFCWHINDGETQRYVFDSTNLQFALVKCPCCYS-----339
CRE_28419      VRTNHNNDCEEKIMK-----PEIWDYDGLR-----LYPKECPTLRTTFSSVHVKDGKTRKYVFNPICLPFNVVKCQCCVDAS-LII--DKEENTHVALYTCNTTSTKLMRSNKDGCINKEFLTAYAGEQ--RTLOKSPIRIDSHL400
.....310.....320.....330.....340.....350.....360.....370.....380.....390.....400.....410.....420.....430.....440.....450

```

```

Ce_CEH-86      -----DGTEGYFLRNKHEYFKKIVTVGF--SDGSVKPCVWIE-KISEYQIIDQETIRL-----KENSRVMAIDAEAREQVHRQR377
Ce_C35E7.2a    TN-----SESNH-----YNTKSCEENLEKCPANENHOTLVATEGATFGTIYMMNNENYK-----DPPKIAPT-----344
CBG08468      PLHEIQKR-----HRYIYNRKLGVLEELQSDGRFQIMYTEFNTTGEIVMKDTRDT-----ILPFSRSDLMGRTSFVEITAEQLHEKR350
CRE_28417      SMRDLLLR-----YHYERNRNASMNSRQVNVNRLAFIEDTTMGRIFFMMDSLNA-----VKPFELM--YV-----371
CRE_28418      DTEKLVEH--YASRKVVSQELPIQIESDETEKN-----ITTRHSSAVTVFLTGMDGKVKLHRIEN--NACDVKENKYLAVNEQGNVRKEDDKRIGRSISDSFVIPTETDISEPVVNTSTIVEGYTYCPHFQOILLYAFYDTH-----467
Ce_C35E7.5a    -----DGTECLVIRKDRVSSNGLYKIDTISF--KDGSVKPYRRND--TTRQYELKSEYEAAGLFSVETVEE-----SERVSLDWDLTPTKTVSCTHNDRTLFTAGNNFTQTDGFFYNSSTGHVHEHS332
CBG08470      EKDOLIAHFFSIRTYKNLLOFSET-----DGTEON-----NASSQEMDALIGDGOVKLRKVQ--PPESQSEEDG-----TDKDEMLOSLSEQDL-----481
Ce_C35E7.3     AVEDILKHYTPRRNCPDQYFQSFDSKNEEKFNFLNYSNLCEKKNNSAMIIIGMDGTIRNVLQD-----TKTKPQGHMKWKRYALDNDLLEPKSLQCIHSIVPIMFCNTSGMRGYVILDMRSGHIMEHP453
CAEBREN_12536  APNEIISR--RLAENIHITOMTQLFTAEGLEGVLRTRQRTSSDGCTOIGTMAL--MDGSVKPITIDC--NRYNFAIYHADCVNL-----TKTKPQGHMKWKRYALDNDLLEPKSLQCIHSIVPIMFCNTSGMRGYVILDMRSGHIMEHP467
CBG08472      -----YDD-----NPNMSFIATY-----353
CRE_28419      MPHEFGIR--RIEN--NVPHMIOILISKDEANVIRRRFRLGSDGKTATGTVVL--MDGSVKPFYDQ--KLMEYALFEPDCHDLAA--LKTNPNASPHVNCDRYALDNDLTPRSLAYCTHFNNHPTAYNH--TNSTHTYVYNGSTGHLHENS544
.....460.....470.....480.....490.....500.....510.....520.....530.....540.....550.....560.....570.....580.....590.....600

```

```

Ce_CEH-86      K-----LNSNEKRKEEEAEQEKLEKEMAELEIQ-----407
Ce_C35E7.2a    -----IPGTGTFLLISSLDFKSRKVIAS-----469
CBG08468      QKGAKIAALRCGEFQEQEAFDPASC-----DHCCNKRKGLKLEKQCVDRGAYGSGPYGSGHPS--DRPGDRARSMDAWPATIYIPFETLPQIPPPPRPINFPIASRQFP-----455
CRE_28417      -----PNSAEQTLLEIDPLTHRRKQEL-----394
CRE_28418      -----PIQLLLTSYLIQVKNCSCEKSRSGPHVLKVSNNMFPCEEGFAHRVYAKNRTIQKIEYDS--TKTWKDVHEYSIRLKGIEEENARKDIEINNDSPFKRCCCN-----571
Ce_C35E7.5a    GCSTC-----KSSVIDSSQVIASSIPFTRCAIILKTNKEGRFLKVLGNECSRKLYEAMALKVNVHVPVQSNHARKIOTVEDVLNVYKQVQEAANKKVDEVEKHERISSLEKECNMHLESLKMMNDSRKEFEVNAELEKKVFDL477
CBG08470      -----EESPLDRLENTYKQHSNRVSRGLAEM-----507
Ce_C35E7.3     -----SCA-----ANNTQSASIRVRERESRT-----453
CAEBREN_12536  GCQCELRDPTKIAPIAPSTVIFWISSPLSATDVVYATNSDGYLVKVSKNPVTEESGMIPLRLVTPD--EVNQFTGYQQQDQINQKLSAMENTLRQNLVQISLEVKISENTLE-----580
CBG08472      -----SCA-----ANNTQSASIRVRERESRT-----376
CRE_28419      GCETCQKE--RMYSIGPNOVIFGAASPOSKRAIILSTNSEGRLLKIGENSSKVVYCGMVPSPRVITEK-DV--QFLGEQNSKTEELIRSGRIPEKKLHEETVARLETRVMEAEKKIKDTETQNNMLSEEKTLLEKQIMELEQOIKOLNEGK690
.....610.....620.....630.....640.....650.....660.....670.....680.....690.....700.....710.....720.....730.....740.....750

```



|               |                                                                                                                                                         |      |
|---------------|---------------------------------------------------------------------------------------------------------------------------------------------------------|------|
| Ce_CEH-86     | EETTTKPEYRKLRMS-----RRKQNELLOKWLEKNTENTHA EKTNOEKK TENAVO-----EQLEOMMKMIOEERRAADSKNKLQEMVLEMKD KLDLAQETRIKELEEVIKS                                      | 683  |
| Ce_C35E7.2a   | TFFQQAPHPAPNAQT-----ANSMQSIABLLAQRGAPRPRRLTTEGGPK-----YNRVPPSPRIPSSTDKKEMLKSNDRFDKLRREEVSDVRTQLSGLEDTPFTFK                                              | 656  |
| CBG08468      | KLYVEALAKTKCVHNVT-----LAAGHOLA EKRELANEHLKSEKAKKO-----LQMHYEPSEIMHTDLLKYDARVKEVYFGESENDEKNKGSGPSTSSDPE                                                  | 785  |
| CRE_28417     | QLAALVPPTNYQHYPF-----RTEDPREKLENELKNLEE-----MFRDNVTLCASSHGESSHAAVYAPRTKKTVMRMDMRSPMEKNQETOEPNLIVE                                                       | 713  |
| CRE_28418     | KMLYEMDDVECTFKTKLYFLRFSLKNEFEFSQYOETEDFAGPTFPVEESERHKVFYSNANVLSTSIFMKS-----SESVFGEDDDDSHSSTNSIYSDVGGVGNNVITRSHSVYEGAFERSENNMNSVDH                       | 956  |
| Ce_C35E7.5a   | EDNDAEYTSIALEPS-----DFEDNCDFESTATAVEPLDFEELSMDVTOQNSESFGVEHVED-----DTQSTTTTALEPSDIENDCNCDVESTTAVEPLDFEDDNSLDTQESDSLLEMEHVE                              | 1069 |
| CBG08470      | DSGEVSDENSTDEHKA-----NRERNRDGPDDSETSFW-----KLYLOGGDDEPKOSNDSDALEE-----IWDILRKNGYSDEPAGSROSGLENCADGIEEDEVASDKGDVADEISDENAEDDVD                           | 839  |
| Ce_C35E7.3    | -----EATQPSTSSVDF-----EKMAKERGOTLEEFS-----HLVSRYFYSEVVASNDVVSQPPPLRLKLEAPSDESEDSDLRVESIGIRDISDTESEETDDSSDISRIESIGIQDISDTETALEPELDELSELKIDEESSDDSD       | 492  |
| CAEBREN 12536 | DDEE                                                                                                                                                    | 1441 |
| CBG08472      | -----THOSETATSNDIKCV-----E LIENDREDAESTA TALENDQEDVESTTALDHSDVEEDVEVDEDOMSTATATDGEODDVESTV TALDISDISDAEFVNEHDIDDASSTATAIEGDQDDVESTATALDVSDISDSA EFINGHD | 393  |
| CRE_28419     | .....1510.....1520.....1530.....1540.....1550.....1560.....1570.....1580.....1590.....1600.....1610.....1620.....1630.....1640.....1650                 | 1429 |

|               |                                                |      |
|---------------|------------------------------------------------|------|
| Ce_CEH-86     | SGED                                           | 733  |
| Ce_C35E7.2a   | VQ                                             | 707  |
| CBG08468      | MNLDLD                                         | 832  |
| CRE_28417     | VNLDLD                                         | 770  |
| CRE_28418     | VDANVPPT                                       | 1017 |
| Ce_C35E7.5a   | MDIASDKESLVSESNYQDFMDPTIHSFTNSQIAEADONFPFGCILS | 1182 |
| CBG08470      |                                                | 892  |
| Ce_C35E7.3    |                                                | 492  |
| CAEBREN_12536 | SGMDGDDEESFAEQEPFGSAHPDDVPAPQVDPINQQ           | 1590 |
| CBG08472      |                                                | 393  |
| CRE_28419     | FSVNGDEPSESEMVKSNYEDCNDLGEAEPEGEERPVAQDANTCITS | 1625 |
|               | .....1810.....1820.....1830.....1840.....      |      |

**B**

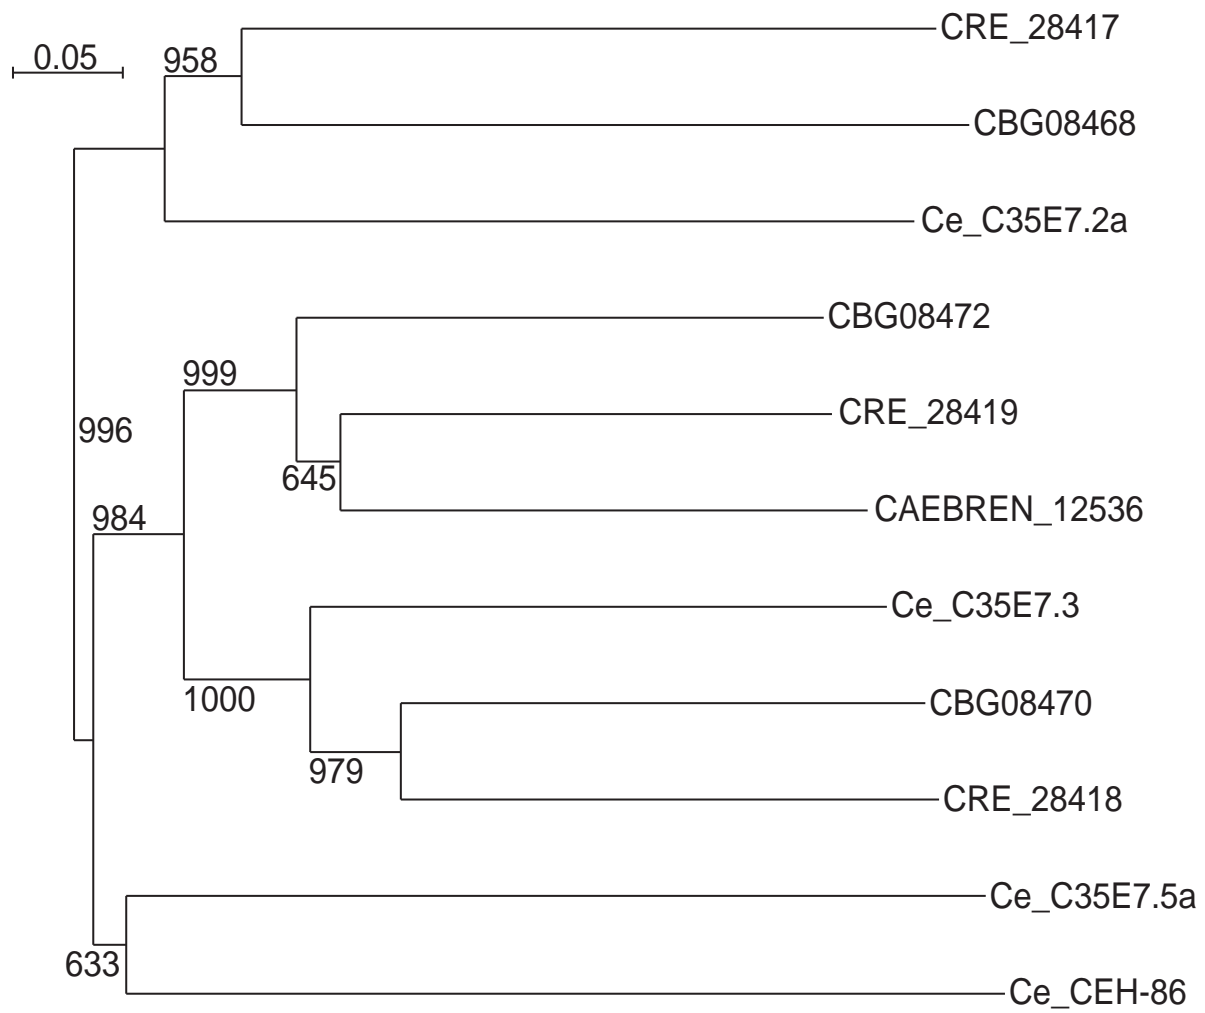

Supplement: Supplementary file [file 1]
