# Supplementary material
Source: publisher figshare collection journal article supplement (https://plos.figshare.com/articles/dataset/_/1430592)
Supplement: Supplementary file [file 1]

## ZFH-2

MDVALLTMDNNKPPTSSESTESRETSPMPMPDSAEIMRLLTDPSTAQMIFANENTKCQLGRILAASGFDEASLSSSFPPDPTLGAFADISQFSSLRNSSK 100  
 TLKCPKCNWHYKYQETLEIHMKEKHNDVDVKCMFCAENRPHPKLARGETYS CGYKPYRCDLCRYSTTTTKGNLSIHMOSDKHLHAVQELPNSIEFAANFAC 200  
 GAPVSRSSPIEESDGLVCLICGIFATESIAEMMEHVEQDRSRTFQGDVTVLNGSFRCHLCPYNTTLKANFQLHTRTDKHLQKVQIDKSGDQIFKARIHN 300  
 FFLRNFEVSNPNSLLFLNLIFDIPDFKTMEDAAIACAGCEFTTKDVSDFEHAKGHEEEAGASSQKACALCLEPTDDLEKHLVEQHRIAESAIEKFLL 400  
 TERTAKEASCSSSEPSSEFAHRCSRCMAFRSESQLOTHSLQHVFNTHKCPCTCGDSFDENTIVTHMLEHTKEECMCSETFATKEAFLSHLNSARHLQ 500  
 QAKKQLENSLVDLNSQDVEKQRIYVCNVCKQSYPQAAANLDVHMRSMTHQSRMSRLSELVATGELNGEKAVFEQPGIPAPTINSFIETTTNQSSLNDLMSL 600  
 LTRSESEIREEVNGLQVMTQIKVYGESKITSLVPELAGKIDNIALFDDSRAAEVSKIDCSACGQOISGILALNLHYEESHSSKIPSDVLRKFGERLLAA 700  
 LEDGLSRENSVKNGSQSPLSNDDEPMEKKMRLNMLPEMDKNAAASQFAMFQOMMNCFFMAPPGTSSGNFGFSPEMINQLMNPAAAAAATAAAAAHAA 800  
 NNSPAAKRARTRITDDQLKVLROQYFNINNSPSEAQIKEMSQKASLPEKVIKHWFRNTLTKERQRDKDSPYNFSIPPQMGIDLDIYEKTGETKVLSLSNEAP 900  
 KSELSSARATPTIPTIPLIVEEKKPEPKSQTPSSSSSQNLQAMLSQMQGSFFDASNFMASVNPMTPTSTPCNTSSSGRRANRTRFTDFQLRTLQQFF 1000  
 DKQAYPKDDDLEALSKKLQLSPRVIVVWFQNAKQKARKIYENQPNHESSDRFVRTPGSNFOCKRCSQVFORYYELIQHQOKKC CYKDDVAALASDNKSVEE 1100  
 SLTEEEKSQLLAQQOVAQLASTLELPKFQPAELLKMIGANSVTPSSSAASQKSSNDVLLKMCESIVGGSTPSTSSFHKLCTIFCAQDFKDRSAMSEHMAQK 1200  
 HPQHMLLPNFDLDMMPDAGGAELLMDLKDSALDLGSSVDYRDSISTSPSRSEDDVLTEALDDSAFAAFGLQLANSTSGSECRSPASNKRFRTHLTPMQV 1300  
 QMMKSVFNEYKTPSMAECCELLGKEVGLHKRVVQVWFQNAKAKERKTRGAVDEDSRSGELHCEICDKTFATRLSLQDHLFAEQHIEFLRNNLKREGVSELT 1400  
 TASVTECSPEKKAKLPNPLDLASFPLNTFDIQIYGTPIAFLQVPDEIKKQITDDITAGKSRTTFSQDGFPLDKLKESLPEDEKSNLTVTQKDVGNACPA 1500  
 CTFVFQEEKKLREHQKAMCQSDKTLTLVQTHYSCKSCQSDFCLOSEYQFHLSPMPHTTTTTTTTTTTP 1565

S2 Figure
